# Supplementary material for: Enzymatic hydrolysates of corn stover pretreated by a N-methylpyrrolidone–ionic liquid solution for microbial lipid production
Source: Royal Society of Chemistry journal article supplement (doi:10.1039/c2gc00033d), 2012-01-01
Supplement: c2gc00033d.pdf [file c2gc00033d.pdf]

## Supplementary Information

# Enzymatic Hydrolysates of Corn Stover Pretreated by the N-Methylpyrrolidone/Ionic Liquids Solution for Microbial Lipid Production

Haibo Xie,<sup>\*a, b</sup> Hongwei Shen,<sup>a, b, c</sup> Zhiwei Gong,<sup>a</sup>, Qian Wang,<sup>a</sup> Zongbao K. Zhao,<sup>\*a, b</sup>  
Fengwu Bai<sup>c</sup>

<sup>a</sup>Dalian Institute of Chemical Physics, CAS, Dalian 116023, PR China

<sup>b</sup>Dalian National Laboratory for Clean Energy, Dalian 116023, PR China

<sup>c</sup>School of Life Science and Biotechnology, Dalian university of Technology, Dalian, 116023, PR China

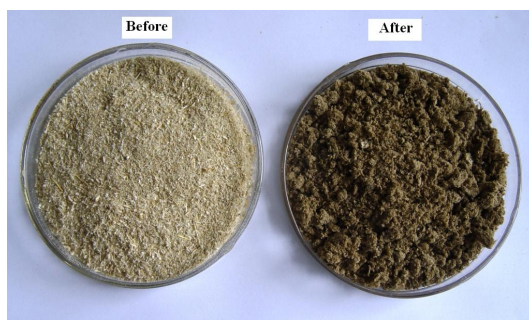

Fig S-1 Visible comparison of corn stover and pretreated corn stover

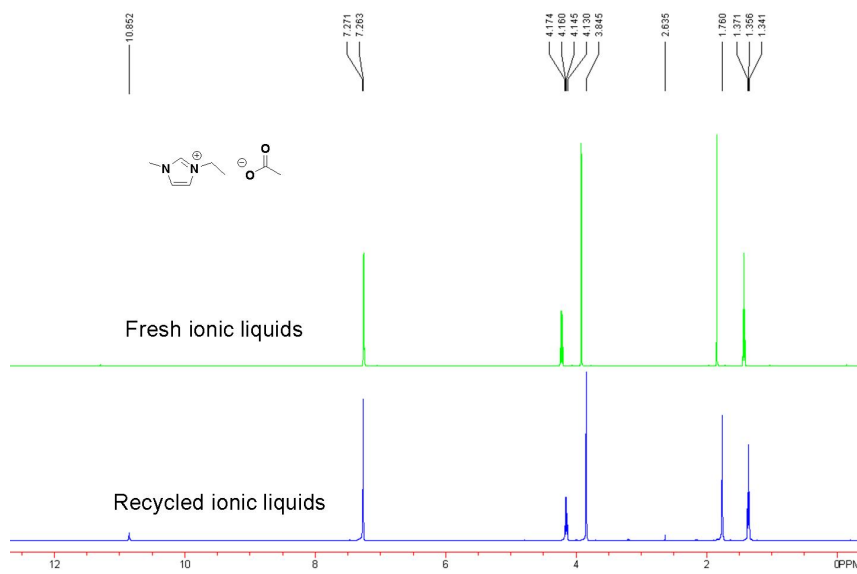

Fig. S-2 The comparison of <sup>1</sup>H NMR of fresh ionic liquids and recycled ionic liquids

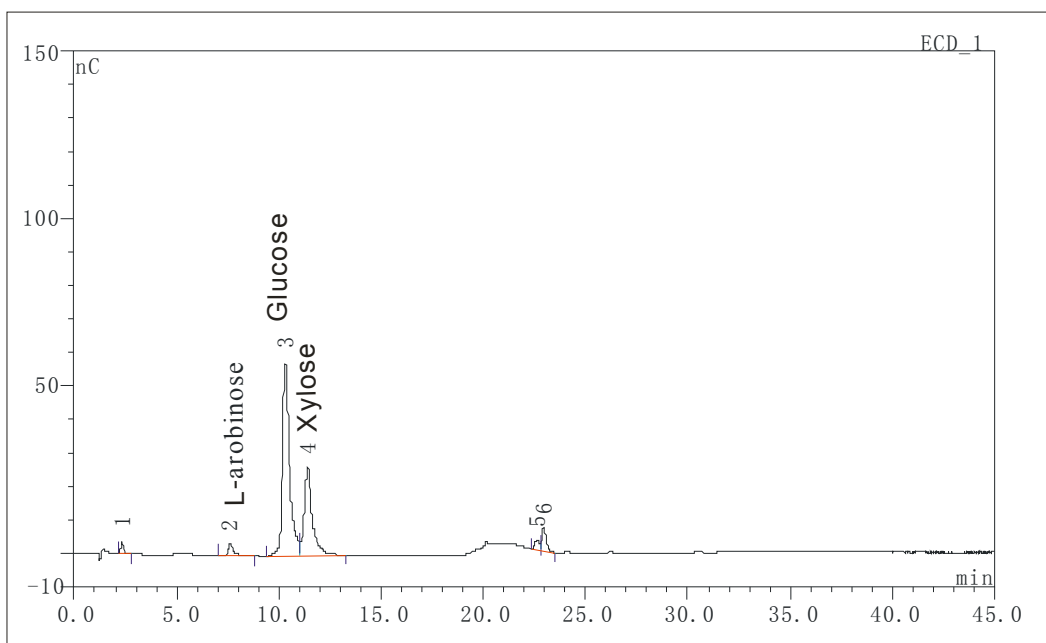

Fig S-3 Ion chromatograph analysis of cultivation medium, which is diluted to 10000 times by water, before the cultivation of oleaginous yeast *R. toruloides* Y4

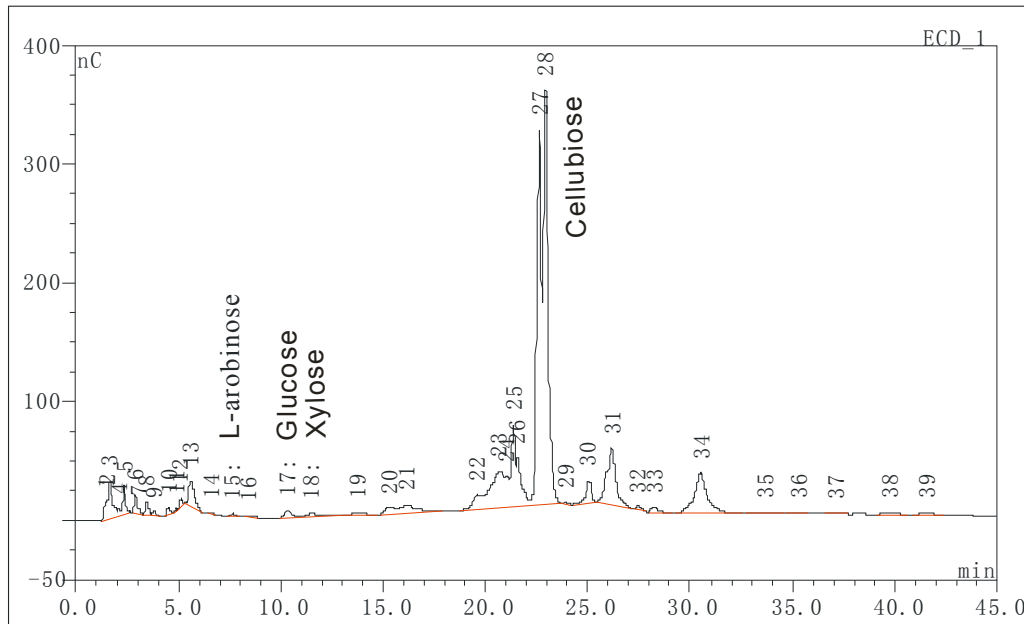

Fig S-4 Ion chromatograph analysis of cultivation medium, which is diluted to 100 times by water, after 159 h cultivation of oleaginous yeast *R. toruloides* Y4

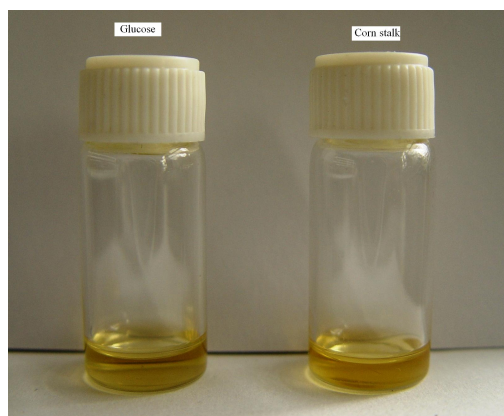

Fig S-5 Visible comparison of lipids from commercial glucose and hydrolysates from corn stover in this study, respectively.
